1 Nonalcoholic fatty liver disease is associated with decreased hepatocyte mitochondrial  
2 respiration, but not mitochondrial number

3

4 **Authors and affiliations:** MC Sinton<sup>1</sup>, J Meseguer Ripolles<sup>2</sup>, B Lucendo Villarin<sup>2</sup>, MJ Lyall<sup>1</sup>,  
5 RN Carter<sup>1</sup>, NM Morton<sup>1</sup>, DC Hay<sup>2</sup>, AJ Drake<sup>1</sup>

6

7 **Corresponding author:**

8 Amanda J. Drake: University/BHF Centre for Cardiovascular Science, Queen's Medical

9 Research Institute, Edinburgh BioQuarter, 47 Little France Crescent, Edinburgh EH16 4TJ.

10 [mandy.drake@ed.ac.uk](mailto:mandy.drake@ed.ac.uk)

11

12 **Address:**

13 1. University/BHF Centre for Cardiovascular Science, Queen's Medical Research Institute,

14 Edinburgh BioQuarter, 47 Little France Crescent, Edinburgh EH16 4TJ

15 2. Scottish Centre for Regenerative Medicine, Edinburgh BioQuarter, 5 Little France

16 Crescent, Edinburgh, EH16 4UU

17

18

19

20

21

22

23

24

25

26

27 **Abstract**

28 Nonalcoholic fatty liver disease (NAFLD) is currently the most prevalent form of liver disease  
29 worldwide. This term covers a spectrum of pathologies, from benign hepatic steatosis to  
30 non-alcoholic steatohepatitis (NASH). As the disease progresses, NASH can develop into  
31 cirrhosis and hepatocellular carcinoma. However, the underlying mechanisms and the  
32 factors which predispose an individual to disease progression remain poorly understood.  
33 Whilst NAFLD appears to be associated with mitochondrial dysfunction, it is unclear whether  
34 this is due to respiratory impairment, changes in mitochondrial mass, or mitochondrial  
35 fragmentation. Using a human pluripotent stem cell-based model of NAFLD we show that  
36 exposure to lactate, pyruvate and octanoic acid results in the development of macrovesicular  
37 steatosis. We do not observe changes in mitochondrial mass or fragmentation but do find  
38 decreases in maximal respiration and reserve capacity, suggesting impairment in the  
39 electron transport chain (ETC). Taken together, these findings indicate that the development  
40 of macrovesicular steatosis in NAFLD may be linked to the impairment of the ETC in  
41 mitochondria.

42

43

## 44 **Introduction**

45 Non-alcoholic fatty liver disease (NAFLD) is the most prevalent form of hepatic disease  
46 globally, estimated to affect 1 in 3 people. It is closely related to obesity, with ~88% of obese  
47 individuals at risk of developing the disease [1]. NAFLD is characterised by excess  
48 accumulation of triglycerides (TGs) in hepatocytes, leading to the development of steatosis  
49 [2]. Steatotic hepatocytes accumulate TGs in single large, or multiple medium-sized,  
50 cytoplasmic lipid droplets [3] and whilst simple steatosis is largely benign, its presence  
51 increases the risk of developing non-alcoholic steatohepatitis (NASH), which may progress  
52 to cirrhosis and hepatocellular carcinoma [4]. It is unclear why only a subset of patients  
53 develop NASH and, other than bariatric surgery for morbidly obese patients, there are  
54 currently no specific therapeutics available to treat or reverse this pathology [5].

55

56 Multiple studies suggest that the pathology of NAFLD is linked to impairment of  
57 mitochondrial function[6–9]. In rat models, mitochondrial dysfunction precedes the  
58 development of hepatic steatosis, suggesting that disease pathology and progression are  
59 linked to impairment of mitochondrial function [10]. NAFLD is linked to structural changes in  
60 mitochondrial cristae and the development of crystalline inclusion bodies [11]. As electron  
61 transport chain (ETC) components are embedded in the cristae, structural changes may  
62 have a physical impact on respiration [12]. Similarly, the growth of inclusion bodies may also  
63 impair oxidative phosphorylation and lead to increased free radical production [11]. This is  
64 supported by observations of NAFLD-associated hepatic oxidative stress and altered levels  
65 of fatty acid beta oxidation [11,12]. This is supported by the observation of NAFLD-  
66 associated hepatic oxidative stress and altered levels of fatty acid beta oxidation [11,12].  
67 Furthermore, in humans, once hepatic lipid content exceeds 10%, lipid export is  
68 compromised [13]. In tandem with altered fatty acid beta oxidation, this imbalance may lead  
69 to the accumulation of intracellular lipids observed in NAFLD.

70 Satapati et al. (2012) observed increased tricarboxylic acid (TCA) cycle activity and  
71 anaplerosis in the livers of mice with high fat diet-induced hepatic steatosis [7]. They also  
72 demonstrate that increased levels of hepatic TGs induced oxidative metabolism, with a  
73 proportional increase in oxidative stress [14]. Indirect studies in humans indicate a similar  
74 effect on TCA cycle flux [6]. As TCA cycle flux generates NADH and FADH<sub>2</sub>, which transfer  
75 electrons to the electron transport chain (ETC), alterations in TCA cycling may have a direct  
76 impact on respiration and oxidative stress. Further studies in humans demonstrate that  
77 NAFLD and NASH are associated with increased and decreased mitochondrial maximal  
78 respiration, respectively, indicating that there is a transition in mitochondrial function  
79 between these two disease states [15]. The reasons for this are unclear; such differences in  
80 maximal respiration between NAFLD and NASH could reflect impairment of the ETC and/or  
81 changes in baseline mitochondrial respiration. Furthermore, mitochondria isolated from  
82 whole tissue come from multiple cell types, which may differ in proportion in disease states  
83 and this may confound the interpretation of any results. Observations that mitochondrial  
84 mass increased in NASH with a concomitant decrease in maximal respiration may also arise  
85 from organelle fragmentation, a phenotype associated with oxidative stress and apoptosis in  
86 other diseases [16].

87

88 In light of current knowledge, we hypothesised that nutrient excess in NAFLD leads to  
89 mitochondrial dysfunction and subsequent increases in ETC activity due to increased  
90 availability of respiratory substrates. Therefore, we aimed to determine the impact of lipid  
91 accumulation on mitochondrial respiration specifically in hepatocytes, to avoid the  
92 confounding effects associated with bulk tissue analysis. We also aimed to determine  
93 whether changes in respiration were related to altered mitochondrial mass or fragmentation.  
94 To this end, we used a recently developed *in vitro* model of NAFLD [17] to explore the  
95 impact of hepatic steatosis on mitochondrial respiration.

96

## 97 **Methods**

### 98 **Differentiation of pluripotent human stem cells to hepatocyte-like cells and induction** 99 **of intracellular lipid accumulation**

100 Human female H9 pluripotent stem cells (PSCs) were differentiated to hepatocyte-like cells  
101 (HLCs) as previously described [18]. HLCs were cultured in a 96-well format for  
102 measurements of lipid accumulation and in a 6-well format for all other analyses.

103 Intracellular lipid accumulation was induced in HLCs, as previously described [17]. Briefly, at  
104 day 17, HLCs were exposed to a cocktail of sodium L-lactate (L; 10mM), sodium pyruvate (P;  
105 1 mM) and octanoic acid (O; 2 mM) (Sigma, Gillingham, UK).

106

### 107 **High content analysis microscopy**

108 Cells were stained with a cell painter assay, adapted from Lyall *et al* and Bray *et al* [17,19].

109 Cells were fixed with 50  $\mu$ L/well 4% (wt/vol) paraformaldehyde (Electron Microscopy

110 Sciences, 15710-S) for 15 minutes at room temperature. For permeabilisation, cells were

111 incubated in 0.1% Triton X-100 (Sigma-Aldrich, T8787) in PBS for 15 minutes at room

112 temperature. For lipid droplet analysis, cells were then stained with a combination of

113 NucBlue Live ReadyProbes<sup>®</sup> Reagent (2 drops/mL) (Molecular Probes, R37605), HCS

114 CellMask<sup>™</sup> Red (2  $\mu$ L/10 mL) (Invitrogen, H32712), and BODIPY<sup>™</sup> 493/503 (1:1000) (Life

115 Sciences, D3922), as per the manufacturer's instructions. For mitochondrial quantification,

116 cells were stained with a combination of NucBlue Live ReadyProbes<sup>®</sup> Reagent (2 drops/mL),

117 MitoTracker<sup>™</sup> Deep Red FM (1/4000; Invitrogen, M22426), and Alexa Fluor<sup>™</sup> 555 Phalloidin

118 (Invitrogen, A34055). Following staining, images were acquired using an Operetta High

119 Content Analysis microscope (Perkin Elmer, Buckinghamshire, UK). Lipid droplet

120 morphology was analysed as previously described [17].

121

122

### 123 **Cell mitochondrial stress test assay**

124 The oxygen consumption rate (OCR) of LPO-exposed HLCs was measured using the  
125 Agilent Seahorse XF Cell Mito Stress Test Kit (Agilent, 103015-100) on a Seahorse XF  
126 Analyser (Agilent, California, USA). Analysis was performed under basal conditions, and  
127 following treatment with oligomycin A (an ATPase inhibitor), carbonyl-cyanide-4-  
128 (trifluoromethoxy) phenylhydrazone (FCCP; an ETC uncoupler), and combined rotenone and  
129 antimycin A (inhibitors of complex I and III, respectively). Two concentrations of FCCP (0.5  
130  $\mu\text{M}$  and 1.0  $\mu\text{M}$ ) were used for optimisation. Since replicates within each group responded  
131 similarly to each other, results were combined. OCR was normalised to total protein for each  
132 well, using the sulforhodamine B (SRB) assay, as previously described [20], but with  
133 spectrophotometric measurements read at 540 nm.

134

### 135 **Citrate synthase assay**

136 Mitochondria were isolated using the Mitochondria Isolation Kit for Cultured Cells (Thermo  
137 Scientific, 89874), as per the manufacturer's instructions, selecting option A for isolation.  
138 Citrate synthase activity, a marker for mitochondrial integrity, was then measured using the  
139 Citrate Synthase Activity Colorimetric Assay Kit (BioVision, K318), as per the manufacturer's  
140 instructions.

141

### 142 **Protein Extraction**

143 Adherent HLCs were washed once with ice-cold PBS, before incubating in ice-cold RIPA  
144 Lysis and Extraction Buffer (Thermo Scientific, 89900) supplemented with cComplete™  
145 Protease Inhibitor Cocktail tablets (1/10 mL buffer; Roche, 11697498001). The suspended  
146 HLCs were placed on ice for 30 minutes, vortexing every 3 minutes, before centrifuging for

147 20 min at 4 °C, 12,000 rpm. The supernatant was collected and stored at -80 °C until  
148 needed.

149

### 150 **Western blot analysis**

151 Protein quantification was performed using the Qubit™ Protein Assay Kit (Invitrogen,  
152 Q33211), as per the manufacturer's instructions. Protein concentration was measured using  
153 a Qubit™ Fluorometer (Invitrogen, Massachusetts, USA). Equal concentrations (50 µg) of  
154 HLC protein extract in 4 x Sample Loading Buffer (Li-Cor, 928-40004) were loaded onto  
155 NuPAGE™ 4-12% Bis-Tris Protein Gels (Invitrogen, NP0326BOX). Following resolution,  
156 protein was transferred to a methanol-activated polyvinylidene difluoride (PVDF) membrane.  
157 Protein transfer was measured using Revert 700 Total Protein Stain Kit (Li-Cor, 926-11010)  
158 as per the manufacturer's instructions. Membranes were then blocked with Tris-buffered  
159 saline containing Tween 20 (TBST) and 5% skimmed milk powder, before incubating with  
160 either Pyruvate Dehydrogenase (C54G1) Rabbit mAb (Cell Signaling Technology, 3205) or  
161 SDHA (D6J9M) XP® Rabbit mAb (Cell Signaling Technology, 11998), both a 1:1000 dilution.  
162 The membranes were washed in TBST before incubating with the secondary antibody,  
163 IRDye® 680RD Donkey anti-Mouse IgG (Li-Cor, 926-68072) at a 1:10,000 dilution, for 1 h at  
164 room temperature, in the dark, with shaking. Blots were visualised on a Li-Cor Odyssey®  
165 CLx (Li-Cor, Nebraska, USA), and bands normalised to the Revert 700 Total Protein Stain,  
166 as per the manufacturer's instructions.

167

### 168 **Real-time quantitative PCR**

169 Total RNA was extracted from HLCs using the Monarch® Total RNA Miniprep Kit (New  
170 England BioLabs, T2010). cDNA was generated using the High Capacity cDNA Reverse  
171 Transcriptase Kit (Applied Biosystems, 4368814). A master mix was prepared using  
172 PerfeCTa FastMix II (Quanta Biosciences, Inc., 95118-250). cDNA was amplified and

173 quantified using the Universal Probe Library (Roche, Burgess Hill, UK) system on a Roche  
174 LightCycler 480 (Roche Diagnostics Ltd, Switzerland). Details of primers and Universal  
175 Probe Library probes (Roche) and primers used can be found in Table S1.

#### 176 **Measurement of mitochondrial and nuclear DNA**

177 DNA was extracted from HLCs using the Monarch<sup>®</sup> Genomic DNA Purification Kit (New  
178 England BioLabs, T3010). A master mix was prepared using the Luna<sup>®</sup> Universal qPCR  
179 Master Mix (New England BioLabs, M3003). DNA was amplified and quantified using a  
180 Roche LightCycler 480 (Roche Diagnostics Ltd, Switzerland). Primers were designed  
181 against two regions of the NCBI mitochondrial reference sequence NC\_012920.1, and one  
182 region of the genomic reference sequence NC\_000011.10. Primers used can be found in  
183 Table S2.

184

#### 185 **Statistical analyses**

186 All statistical analyses were performed using Graph Prism Version 8.0 for Windows or  
187 macOS, GraphPad Software, La Jolla California USA, [www.graphpad.com](http://www.graphpad.com). Normality of  
188 data distribution was measured using the Shapiro-Wilks test. Normally distributed data were  
189 analysed using a parametric unpaired Student's t-test, and non-normally distributed data  
190 were analysed using a non-parametric Mann-Whitney test. Data were considered to be  
191 significant where  $p < 0.05$ .

192



## 193 **Results**

### 194 **LPO-treatment induces macrovesicular steatosis in HLCs**

195 We previously reported that the high energy substrate cocktail LPO promotes intracellular  
196 lipid accumulation in HLCs [17] although it was not known whether LPO promotes lipid  
197 droplet biogenesis or increased accumulation of lipids within existing droplets. Stem cell  
198 derived HLCs were differentiated and characterised as before [18] (Figure 1A). Analysis of  
199 gene expression using RT-qPCR showed increased expression of transcripts for PLIN2,  
200 PLIN4, and PLIN5, which are typically associated with intracellular lipid droplet membranes,  
201 suggesting an increase in lipid droplet size (Figure 1B-D). Analysis of lipid accumulation  
202 using high content imaging (Figure 1E) demonstrated that LPO exposure was not associated  
203 with a change in the number of lipid droplets (Figure 1F), but led to a ~2-fold increase in the  
204 size of intracellular lipid droplets (Figure 1G), consistent with the development of  
205 macrovesicular steatosis.

206

### 207 **Macrovesicular steatosis in hepatocytes is associated with electron transport chain** 208 **dysfunction**

209 It has been suggested that NAFLD-associated macrovesicular steatosis results in  
210 impairment of mitochondrial respiration and we therefore proceeded to analyse this in  
211 steatotic HLCs (Figure 2A). Basal oxygen consumption rate (OCR), representing combined  
212 mitochondrial and non-mitochondrial oxygen consumption, was unchanged following LPO  
213 exposure (Figure 2B). Additionally, oligomycin A, a complex V inhibitor decreased OCR  
214 equally effectively in control and treatment group. Firstly, this indicated that there were no  
215 changes in ATP-linked respiration in response to macrovesicular steatosis (Figure 2C).  
216 Secondly, when comparing oligomycin A-induced alterations in OCR with those following  
217 addition of rotenone/antimycin A, we could detect no changes in proton leak between groups  
218 (Figure 2D). The addition of the ETC uncoupler FCCP revealed a decrease in maximal

219 respiration in the steatotic HLCs, suggesting ETC dysfunction (Figure 2E). Using OCR  
220 measurements following FCCP treatment, and comparing to the basal OCR, we calculated  
221 that there was a decrease in reserve capacity in the LPO-treated cells, compared with  
222 controls (Figure 2F). Subsequently, complex I and III were targeted with rotenone/antimycin  
223 A, to completely inhibit oxidative phosphorylation, which reduced OCR to a similar level in  
224 both groups, suggesting no difference in non-mitochondrial sources of OCR between the  
225 control and steatotic HLCs.

226

### 227 **Induction of macrovesicular steatosis is not associated with mitochondrial** 228 **fragmentation or alterations in mitochondrial number**

229 To analyse whether the observed changes in OCR could be due to mitochondrial  
230 fragmentation rather than ETC dysfunction we measured citrate synthase (CS) activity. LPO  
231 treatment had no impact on CS activity (Figure 3A), suggesting that mitochondria remain  
232 intact following intracellular lipid accumulation. A final question was whether changes in ETC  
233 function, as demonstrated by decreased cellular maximal respiration and reserve capacity,  
234 were due to decreased numbers of mitochondria in response to intracellular lipid  
235 accumulation. Since these were the only respiratory measurements to change, we  
236 hypothesised that this was not the case. We first measured protein levels of succinate  
237 dehydrogenase subunit A (SDHA) and pyruvate dehydrogenase (PDH) (Figure 3B), which  
238 localise to the mitochondria. Protein levels of SDHA and PDH did not change in response to  
239 intracellular lipid accumulation, suggesting that mitochondrial number is not altered by LPO-  
240 induced macrovesicular steatosis. Furthermore, there were no changes in mitochondrial or  
241 nuclear DNA (Figure 3C) and no change in the ratio of nuclear to mitochondrial DNA (Figure  
242 3D). Finally, we used a high content microscopy-based approach to measure intracellular  
243 mitochondrial quantity (Figure 3E), and observed no changes following exposure to LPO

244 (Figure 3F). Taken together, these data suggest that mitochondrial number is not altered in  
245 the presence of intracellular lipid accumulation.  
246

## 247 **Discussion**

248 In this study we aimed to determine the nature of NAFLD-associated changes in  
249 mitochondrial respiration, and whether these occur as a result of mitochondrial dysfunction  
250 or reductions in mitochondrial number. Using a combination of high content microscopy and  
251 gene expression analyses, we first confirmed that treatment of HLCs with LPO induced  
252 intracellular lipid accumulation (Figure 1). The observed changes in the expression of genes  
253 associated with lipid droplet size (PLIN2, 4 and 5) are also in agreement with findings from  
254 human studies with intracellular lipid accumulation associated with an upregulation of PLIN2  
255 in human hepatocytes [21] and biopsies from NAFLD patients [22]. In adipocytes, PLIN4  
256 localises to the surface of unilocular lipid droplets, and may participate in their early  
257 development. Although there are no human studies describing perturbed expression of  
258 PLIN4 in association with NAFLD, its knockout protects against liver steatosis in mice [23].  
259 Furthermore, PLIN4 knockout diminishes the accumulation of triacylglycerol in lipid droplets  
260 and reduces the expression of PLIN5 in mouse cardiac tissue. Therefore, their interplay may  
261 be important for the pathology of NAFLD. In support of this, *in vitro* studies show that PLIN5  
262 blocks lipid droplet lipolysis in hepatocytes and an increase in PLIN5 expression may  
263 therefore contribute to the development of macrovesicular steatosis [24]. Increases in the  
264 expression of PLIN2, PLIN4 and PLIN5 in LPO-treated HLCs, alongside BODIPY staining,  
265 strongly indicate that this model recapitulates macrovesicular steatosis observed in humans  
266 with NAFLD.

267

268 Following the further establishment of relevance to human disease, we wished to  
269 understand whether macrovesicular steatosis was linked to dysfunction of mitochondrial  
270 respiration [15]. Previous studies have shown that mitochondrial maximal respiration  
271 increases in obese humans with NAFLD but decreases on progression to NASH, despite an  
272 increase in mitochondrial mass. In contrast to the initial hypothesis, we observed decreased

273 maximal respiration and reserve capacity in cells displaying a NAFLD phenotype. This  
274 indicates that whilst mitochondria are mostly able to maintain respiratory integrity in LPO-  
275 exposed cells, the ETC, and therefore oxidative phosphorylation, may be compromised.  
276 Given that these were the only parameters of mitochondrial respiration to change, it  
277 suggests that LPO treatment of HLCs inhibits complexes I-III of the ETC. This effect may  
278 arise due to the use of octanoic acid, which inhibits complex I-III in rat liver, as well as  
279 increasing oxidative stress through reactive oxygen species production [25]. Inhibition of  
280 complex II may also impact on the TCA cycle, potentially altering its function, and the  
281 generation of cofactors necessary for oxidative phosphorylation, further impacting on cellular  
282 metabolism. However, further studies are required to test these hypotheses.

283

284 Finally, we questioned whether changes in maximal respiration arose from fragmentation of  
285 mitochondria or resulted from increased biogenesis. Given that maximal respiration was the  
286 only parameter of respiration that changed, we suspected this was not the case. This was  
287 confirmed by lack of change in the ratio of nuclear to mitochondrial DNA, suggesting that  
288 mitochondrial biogenesis was not affected by LPO treatment in these studies. This is  
289 consistent with human studies of NAFLD which show no changes in mitochondrial mass in  
290 steatotic versus non-steatotic liver tissue [15]. In contrast, liver tissue from patients with  
291 NASH contains greater numbers of mitochondria, with a concomitant decrease in maximal  
292 respiration. Therefore, the model of NAFLD presented here may mirror the transition  
293 between NAFLD and NASH, with respiratory dysfunction in the absence of mitochondrial  
294 biogenesis. This discrepancy may also be due to previous studies using isolated  
295 mitochondria from whole tissues, comprised of multiple cell types, whereas we examined a  
296 single cell population.

297

298 In conclusion, here we demonstrate that the treatment of HLCs with LPO induces  
299 intracellular lipid accumulation in patterns similar to those observed in human pathology.  
300 Furthermore, we observed decreased mitochondrial maximal respiration, in the absence of  
301 altered mitochondrial biogenesis. Taken together, our data demonstrate that hepatocyte  
302 intracellular lipid accumulation is linked to mitochondrial dysfunction in response to the  
303 changing bioenergetic demands associated with NAFLD, impacting on the ETC, and limiting  
304 maximal respiration.  
305

306 **Acknowledgements**

307 MCS was supported by a British Heart Foundation PhD studentship (FS/16/54/32730) and  
308 by the BHF Centre of Research Excellence. BLV and DCH were supported by an award  
309 from the Chief Scientist Office (TCS/16/37). JMR was supported by an MRC PhD  
310 studentship. MJL was supported by a Wellcome Trust PhD studentship as part of the  
311 Edinburgh Clinical Academic Track (102839/Z/13/Z). RNC and NMM were supported by a  
312 Wellcome Trust New Investigator Award to NMM (100981/Z/13/Z). AJD was supported by  
313 the BHF Centre of Research Excellence, Edinburgh. We thank Will Cawthorn for discussions  
314 about mitochondrial quantification.

315

316 **Author contributions**

317 MCS, JMR, BLV, MJL, RNC and NMM performed experiments. DCH and AJD conceived the  
318 experiments. MCS, NMM, DCH and AJD wrote the paper. All authors contributed to drafts of  
319 the paper and approved the final version.

320

321 **Declaration of Interests**

322 Professor David C Hay is a co-founder, shareholder and director of Stemnovate Limited

323

324 **Figure Legends**

325 Figure 1. LPO treatment induces development of macrovesicular lipid droplets. **(A)** H9  
326 hPSCs differentiate to HLCs, losing pluripotency and gaining expression of the hepatic  
327 markers albumin and HNF4A (n = 3 biological replicates/group); **(B-D)** PLIN2, PLIN4, and  
328 PLIN5 expression increases in response to LPO treatment (n = 3 biological replicates per  
329 group). **(E)** Representative images of lipid accumulation in control & LPO-treated groups 10x  
330 magnification. **(F)** Number of lipid droplets do not increase, **(G)** but intracellular lipid droplets  
331 increase in size (n = 32 biological replicates/group). Data analysed using two-tailed Student  
332 t-test and expressed as mean ± SD, \* $p < 0.05$ , \*\*\*\* $p < 0.0001$ .

333

334 Figure 2. LPO treatment results in decreased maximal respiration in mitochondria but not in  
335 other aspects of oxygen consumption rate. HLCs were injected sequentially from ports A-C  
336 with 4 μM oligomycin, 0.5-1 μM FCCP, and 1 μM antimycin combined with 200 nM rotenone.  
337 **(A)** Raw trace of OCR comparing cells with or without LPO treatment; **(B)** basal respiration;  
338 **(C)** ATP-linked respiration; **(D)** proton leak; **(E)** maximal respiration; **(F)** reserve capacity  
339 compared to control treatment (n = 18 and 16 biological replicates in the control and  
340 treatment group, respectively). Data analysed using two-tailed Student t-test for parametric  
341 data, or Mann-Whitney U test for non-parametric data, and expressed as mean ± SD.

342

343 Figure 3. LPO does treatment does induce mitochondrial fragmentation or change  
344 mitochondrial number. **(A)** Levels of citrate synthase activity were unaltered by LPO  
345 treatment (n = 3 biological replicates/group); **(B)** Protein levels of succinate dehydrogenase  
346 subunit A (SDHA) and pyruvate dehydrogenase were unchanged (n = 6 biological  
347 replicates/group); **(C)** no changes were observed in abundance of DNA in mitochondrial  
348 region 2 (MT2); mitochondrial region 3 (MT3); or genomic region beta-globin (HBB); **(D)**  
349 there were no significant changes in the ratio of mitochondrial to genomic DNA, indicating no



350 alterations in the quantity of mitochondria in response to treatment (n=4 biological  
351 replicates/group for **C** and **D**); **(E)** Representative images of mitochondrial content in control  
352 & LPO-treated groups 10x magnification. Blue staining = NucBlue, red staining =  
353 MitoTracker Deep Red; **(F)** high content microscopy revealed no changes in mitochondrial  
354 quantity in response to treatment (n = 4 and 6 biological replicates in the control and  
355 treatment group, respectively). Data analysed using two-tailed Student t-test for parametric  
356 data, or Mann-Whitney U test for non-parametric data, and expressed as mean  $\pm$  SD.  
357  
358 **Supplementary materials S1.**  
359 Primer sequences and UPL probes used for qPCR assays

## 360 **References**

- 361 1. World Health Organization. Obesity and overweight. [https://www.who.int/news-](https://www.who.int/news-room/fact-sheets/detail/obesity-and-overweight)  
362 room/fact-sheets/detail/obesity-and-overweight (2018).
- 363 2. Valenti, L., Bugianesi, E., Pajvani, U. & Targher, G. Nonalcoholic fatty liver disease:  
364 cause or consequence of type 2 diabetes? *Liver International* vol. 36 1563–1579  
365 (2016).
- 366 3. Wang, L. & Yu, S. Pathology of non-alcoholic fatty liver disease. *Int. J. Dig. Dis.* **2**,  
367 (2016).
- 368 4. Asrih, M. & Jornayvaz, F. R. Metabolic syndrome and nonalcoholic fatty liver disease:  
369 Is insulin resistance the link? *Molecular and Cellular Endocrinology* vol. 418 55–65  
370 (2015).
- 371 5. Laursen, T. L. *et al.* Bariatric surgery in patients with non-alcoholic fatty liver disease -  
372 From pathophysiology to clinical effects. *World Journal of Hepatology* vol. 11 138–249  
373 (2019).
- 374 6. Sunny, N. E., Parks, E. J., Browning, J. D. & Burgess, S. C. Excessive hepatic  
375 mitochondrial TCA cycle and gluconeogenesis in humans with nonalcoholic fatty liver  
376 disease. *Cell Metab.* **14**, 804–810 (2011).
- 377 7. Satapati, S. *et al.* Elevated TCA cycle function in the pathology of diet-induced hepatic  
378 insulin resistance and fatty liver. *J. Lipid Res.* **53**, 1080–1092 (2012).
- 379 8. Patterson, R. E. *et al.* Lipotoxicity in steatohepatitis occurs despite an increase in  
380 tricarboxylic acid cycle activity. *Am. J. Physiol. - Endocrinol. Metab.* **310**,  
381 ajpgendo.00492.2015 (2016).
- 382 9. Sunny, N. E., Bril, F. & Cusi, K. Mitochondrial adaptation in nonalcoholic fatty liver  
383 disease: novel mechanisms and treatment strategies. *Trends Endocrinol. Metab.* **28**,  
384 250–260 (2017).
- 385 10. Rector, R. S. *et al.* Mitochondrial dysfunction precedes insulin resistance and hepatic

- 386 steatosis and contributes to the natural history of non-alcoholic fatty liver disease in  
387 an obese rodent model. *J. Hepatol.* **52**, 727–736 (2010).
- 388 11. Sanyal, A. J. *et al.* Nonalcoholic steatohepatitis: association of insulin resistance and  
389 mitochondrial abnormalities. *Gastroenterology* **120**, 1183–1192 (2001).
- 390 12. Caldwell, S. H. *et al.* Mitochondrial abnormalities in non-alcoholic steatohepatitis. *J.*  
391 *Hepatol.* **31**, 430–434 (1999).
- 392 13. Fabbrini, E. *et al.* Alterations in adipose tissue and hepatic lipid kinetics in obese men  
393 and women with nonalcoholic fatty liver disease. *Gastroenterology* **134**, 424–431  
394 (2008).
- 395 14. Satapati, S. *et al.* Mitochondrial metabolism mediates oxidative stress and  
396 inflammation in fatty liver. *J. Clin. Invest.* **125**, 4447–4462 (2015).
- 397 15. Koliaki, C. *et al.* Adaptation of hepatic mitochondrial function in humans with non-  
398 alcoholic fatty liver is lost in steatohepatitis. *Cell Metab.* **21**, 739–746 (2015).
- 399 16. Knott, A. B., Perkins, G., Schwarzenbacher, R. & Bossy-Wetzler, E. Mitochondrial  
400 fragmentation in neurodegeneration. *Nature Reviews Neuroscience* vol. 9 505–518  
401 (2008).
- 402 17. Lyall, M. J. *et al.* Modelling non-alcoholic fatty liver disease in human hepatocyte-like  
403 cells. *Philos. Trans. R. Soc. B Biol. Sci.* **373**, 20170362 (2018).
- 404 18. Wang, Y. *et al.* Defined and scalable generation of hepatocyte-like cells from human  
405 pluripotent stem cells. *J. Vis. Exp.* e55355–e55355 (2017).
- 406 19. Bray, M. A. *et al.* Cell Painting, a high-content image-based assay for morphological  
407 profiling using multiplexed fluorescent dyes. *Nat. Protoc.* **11**, 1757–1774 (2016).
- 408 20. Orellana, E. & Kasinski, A. Sulforhodamine B (SRB) assay in cell culture to  
409 investigate cell proliferation. *Bio-Protocol* **6**, (2016).
- 410 21. Sahini, N. & Borlak, J. Genomics of human fatty liver disease reveal mechanistically  
411 linked lipid droplet-associated gene regulations in bland steatosis and nonalcoholic

- 412 steatohepatitis. *Transl. Res.* **177**, 41–69 (2016).
- 413 22. Fujii, H. *et al.* Expression of perilipin and adipophilin in nonalcoholic fatty liver disease;  
414 relevance to oxidative injury and hepatocyte ballooning. *J. Atheroscler. Thromb.* **16**,  
415 893–901 (2009).
- 416 23. Chen, W. *et al.* Inactivation of Plin4 downregulates Plin5 and reduces cardiac lipid  
417 accumulation in mice. *Am. J. Physiol. - Endocrinol. Metab.* **304**, E770-9 (2013).
- 418 24. Wang, C. *et al.* Perilipin 5 improves hepatic lipotoxicity by inhibiting lipolysis.  
419 *Hepatology* **61**, 870–882 (2015).
- 420 25. Scaini, G. *et al.* Toxicity of octanoate and decanoate in rat peripheral tissues:  
421 evidence of bioenergetic dysfunction and oxidative damage induction in liver and  
422 skeletal muscle. *Mol. Cell. Biochem.* **361**, 329–335 (2012).
- 423
- 424
- 425
- 426
- 427
- 428
- 429
- 430
- 431
- 432
- 433
- 434
- 435
- 436
- 437

**Figure 1**

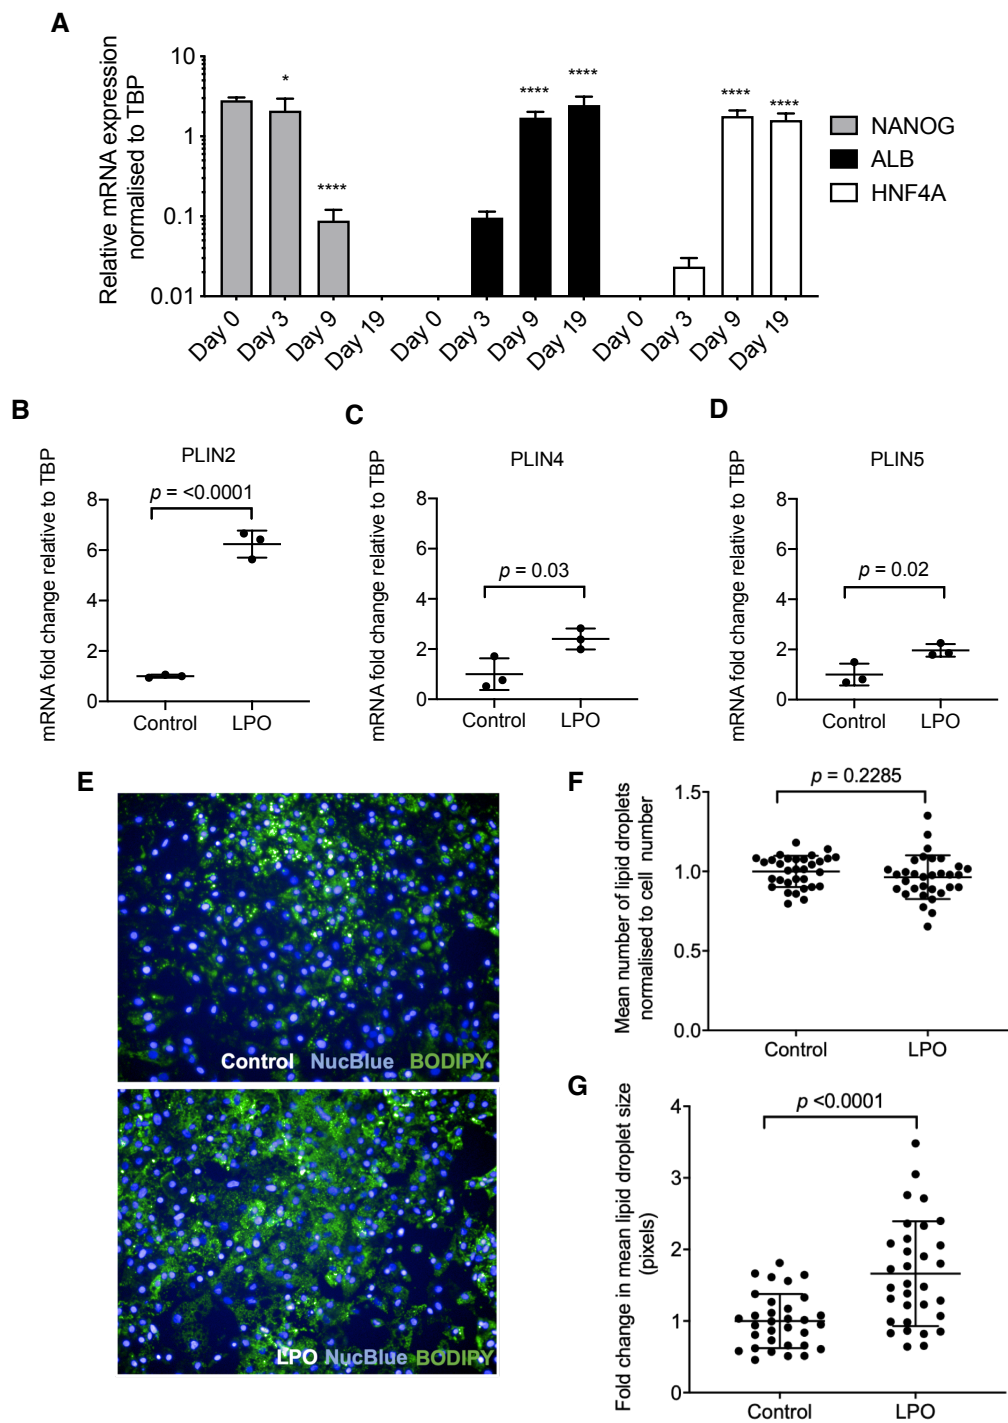

**Figure 2**

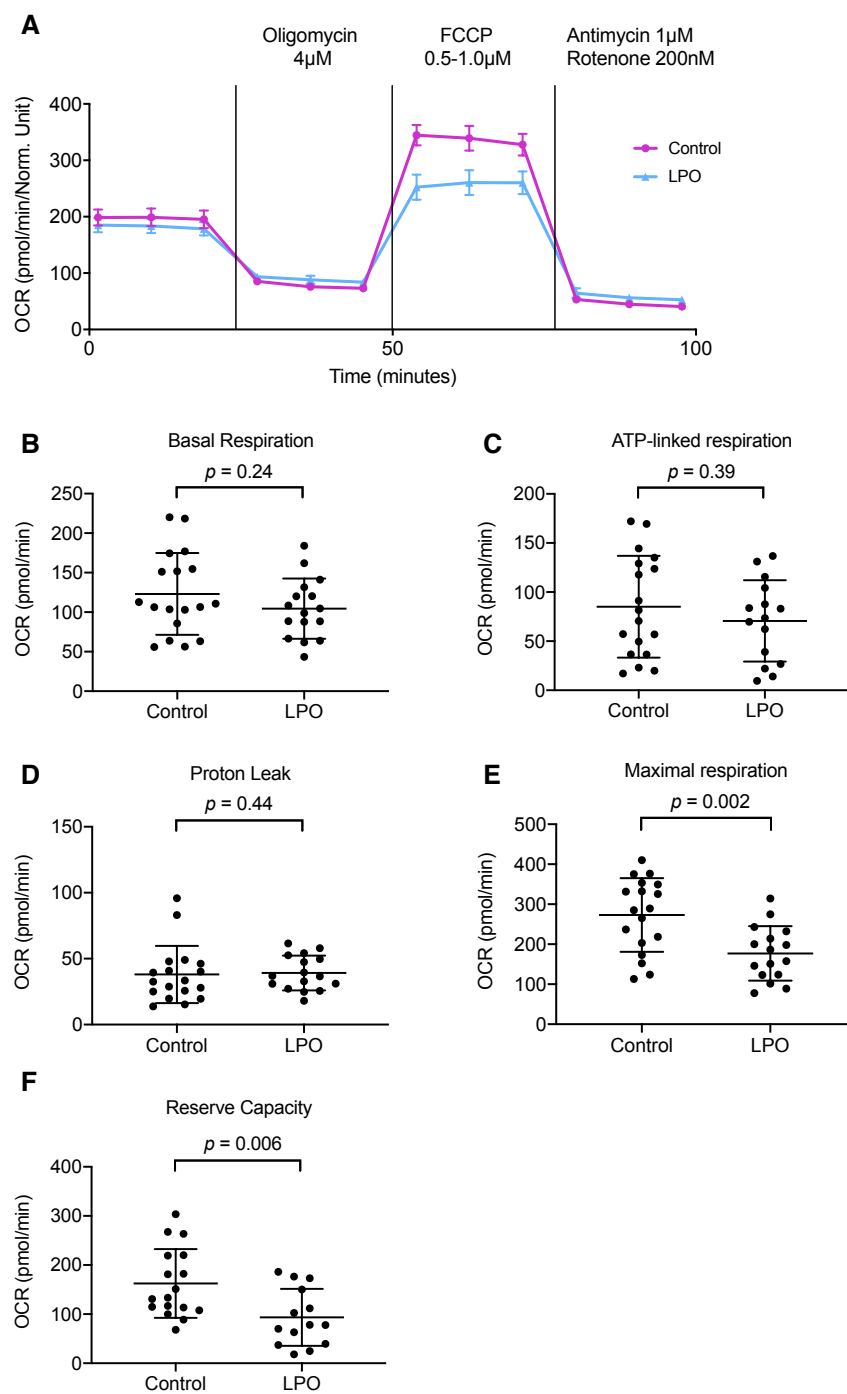

**Figure 3**

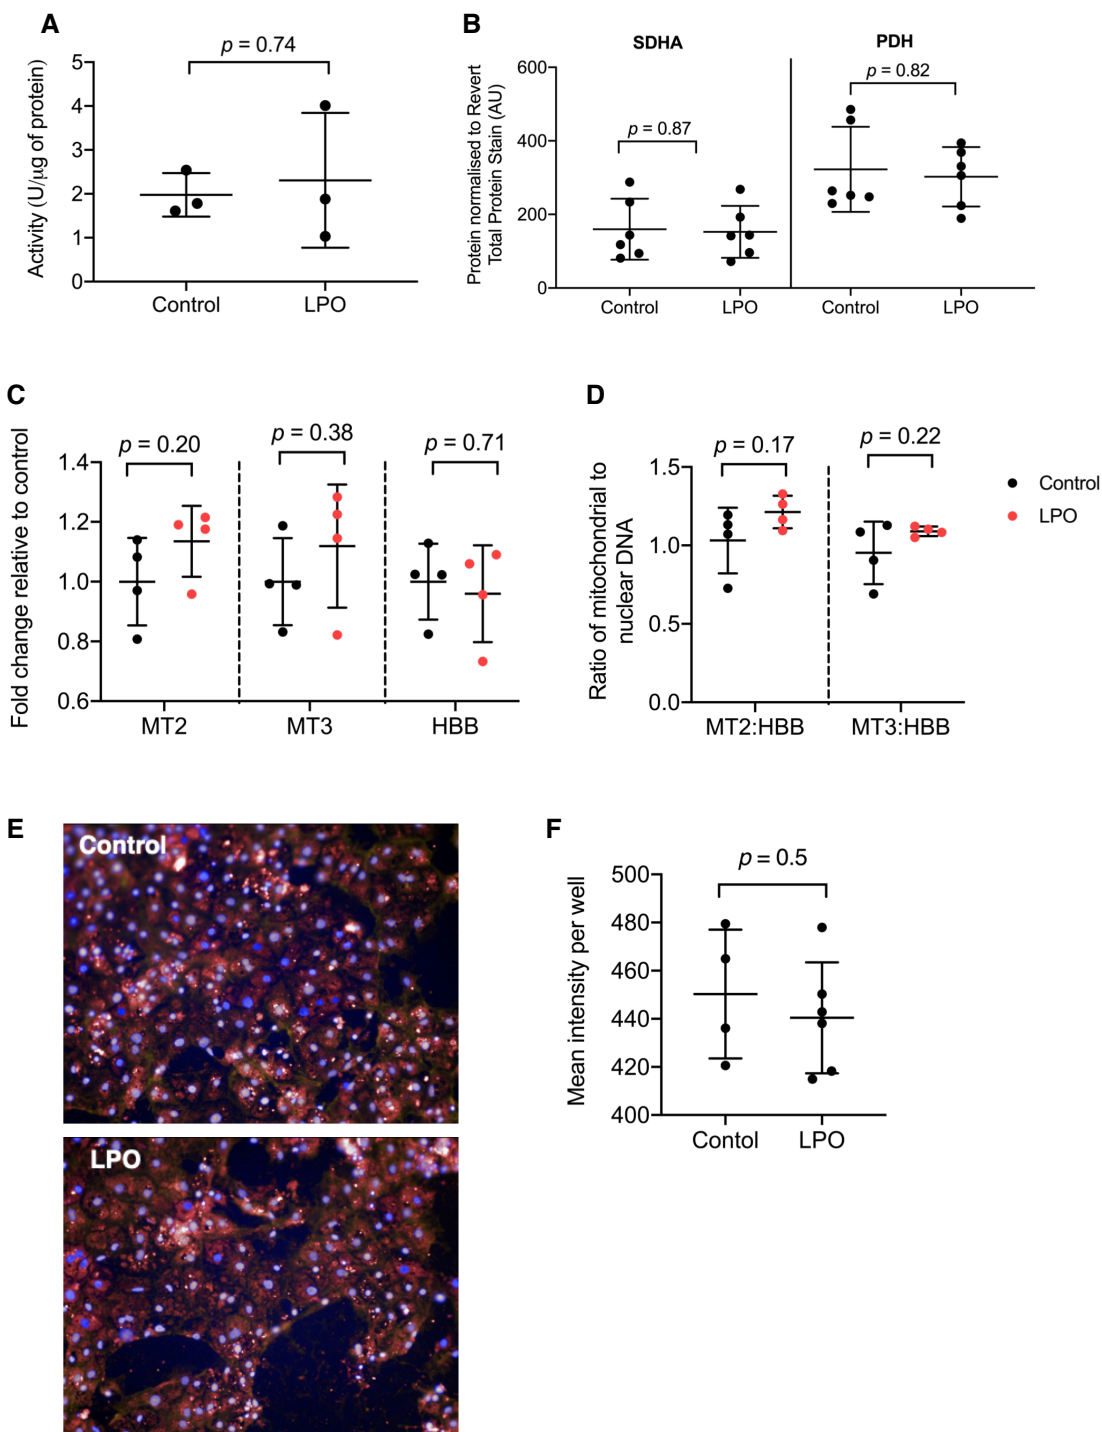

Source: https://www.biorxiv.org/content/biorxiv/early/2020/03/12/2020.03.10.985200.full.pdf
